# Supplementary material for: Recurrent Chronic Subdural Hematoma After Burr-Hole Surgery and Postoperative Drainage: A Systematic Review and Meta-Analysis
Source: PubMed Central journal article supplement (PMC10389757; doi:10.1227/ons.0000000000000794), 2023-06-30

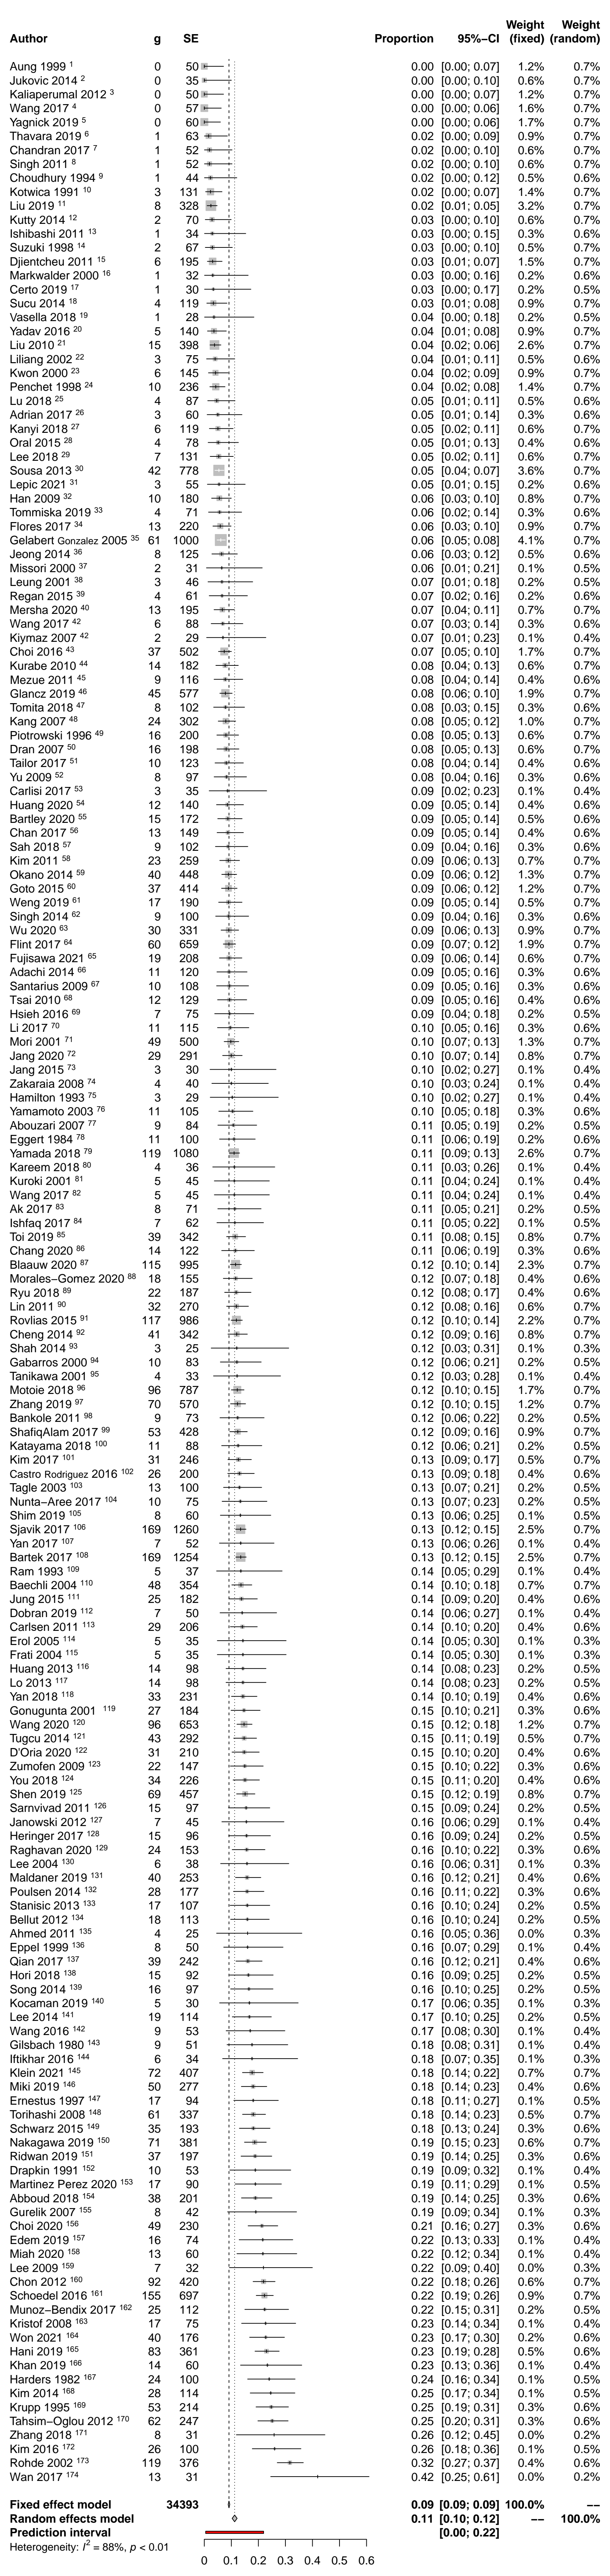

Supplement: ons-25-216-s001.pdf [file ons-25-216-s001.pdf]
