# Supplementary material for: Recurrent Chronic Subdural Hematoma After Burr-Hole Surgery and Postoperative Drainage: A Systematic Review and Meta-Analysis
Source: PubMed Central journal article supplement (PMC10389757; doi:10.1227/ons.0000000000000794), 2023-06-30
Supplement: ons-25-216-s004.pdf [file ons-25-216-s004.pdf]

## Supplementary

**Table 1.** Syntax search

| Medline (ovid) search 1 |                                                              |         | Embase search 1 |                                                               |         | Medline (ovid) search 2 |                                                              |         | Embase search 2 |                                                               |         |
|-------------------------|--------------------------------------------------------------|---------|-----------------|---------------------------------------------------------------|---------|-------------------------|--------------------------------------------------------------|---------|-----------------|---------------------------------------------------------------|---------|
| No.                     | Query                                                        | Results | No.             | Query                                                         | Results | No.                     | Query                                                        | Results | No.             | Query                                                         | Results |
| 1                       | exp Hematoma, Subdural, Chronic/                             | 1302    | #11             | #9 NOT #10                                                    | 1865    | 1                       | exp Hematoma, Subdural, Chronic/                             | 1446    | #11             | #9 NOT #10                                                    | 2162    |
| 2                       | ((Subdural adj (H?ematoma or Hemorrhage)) or CSDH).ti,ab,kf. | 7934    | #10             | #8 AND [embase]/lim AND 'Conference Abstract'/it              | 294     | 2                       | ((Subdural adj (H?ematoma or Hemorrhage)) or CSDH).ti,ab,kf. | 8584    | #10             | #8 AND [embase]/lim AND 'Conference Abstract'/it              | 327     |
| 3                       | exp Drainage/                                                | 58453   | #9              | #8 AND [embase]/lim                                           | 2159    | 3                       | exp Drainage/                                                | 60970   | #9              | #8 AND [embase]/lim                                           | 2489    |
| 4                       | (Drain* or Burr-Hole* or Burrhole* or craniostom*).ti,ab,kf. | 130714  | #8              | #3 AND #7                                                     | 2375    | 4                       | (Drain* or Burr-Hole* or Burrhole* or craniostom*).ti,ab,kf. | 140135  | #8              | #3 AND #7                                                     | 2741    |
| 5                       | Trepan*.ti,ab,kf.                                            | 972     | #7              | #4 OR #5 OR #6                                                | 243393  | 5                       | Trepan*.ti,ab,kf.                                            | 1023    | #7              | #4 OR #5 OR #6                                                | 263813  |
| 6                       | Trephin*.ti,ab,kf.                                           | 4077    | #6              | 'surgical drainage'/exp OR 'cerebrospinal fluid drainage'/exp | 87330   | 6                       | Trephin*.ti,ab,kf.                                           | 4256    | #6              | 'surgical drainage'/exp OR 'cerebrospinal fluid drainage'/exp | 93641   |

|    |                             |         |    |                                                                                                                                                                           |        |    |                             |         |    |                                                                                                                                                                           |        |
|----|-----------------------------|---------|----|---------------------------------------------------------------------------------------------------------------------------------------------------------------------------|--------|----|-----------------------------|---------|----|---------------------------------------------------------------------------------------------------------------------------------------------------------------------------|--------|
| 7  | Trephining/                 | 1505    | #5 | drain*:ti,ab,de,kw OR<br>'burr hole*':ti,ab,de,kw<br>OR<br>burrhole*:ti,ab,de,kw<br>OR<br>craniostom*:ti,ab,de,kw<br>OR trepan*:ti,ab,de,kw<br>OR<br>trephin*:ti,ab,de,kw | 233395 | 7  | Trephining/                 | 1569    | #5 | drain*:ti,ab,de,kw OR<br>'burr hole*':ti,ab,de,kw<br>OR<br>burrhole*:ti,ab,de,kw<br>OR<br>craniostom*:ti,ab,de,kw<br>OR trepan*:ti,ab,de,kw<br>OR<br>trephin*:ti,ab,de,kw | 252791 |
| 8  | 3 or 4 or 5 or 6 or 7       | 166107  | #4 | 'burr hole'/exp                                                                                                                                                           | 39     | 8  | 3 or 4 or 5 or 6 or 7       | 176739  | #4 | 'burr hole'/exp                                                                                                                                                           | 43     |
| 9  | 1 or 2                      | 8077    | #3 | #1 OR #2                                                                                                                                                                  | 18300  | 9  | 1 or 2                      | 8734    | #3 | #1 OR #2                                                                                                                                                                  | 21067  |
| 10 | 8 and 9                     | 1514    | #2 | ((subdural NEAR/1<br>(h?ematoma OR<br>hemorrhage)):ti,ab,kw)<br>OR csdh:ti,ab,kw                                                                                          | 3653   | 10 | 8 and 9                     | 1654    | #2 | ((subdural NEAR/1<br>(h?ematoma OR<br>hemorrhage)):ti,ab,kw)<br>OR csdh:ti,ab,kw                                                                                          | 4067   |
| 11 | exp animals/ not<br>humans/ | 4678989 | #1 | 'subdural<br>hematoma'/exp                                                                                                                                                | 17808  | 11 | exp animals/ not<br>humans/ | 4837305 | #1 | 'subdural<br>hematoma'/exp OR<br>'subdural hematoma'                                                                                                                      | 20602  |

|    |           |      |  |  |  |    |           |      |  |  |  |
|----|-----------|------|--|--|--|----|-----------|------|--|--|--|
| 12 | 10 not 11 | 1512 |  |  |  | 12 | 10 not 11 | 1651 |  |  |  |
|----|-----------|------|--|--|--|----|-----------|------|--|--|--|
