# Supplementary material for: Recurrent Chronic Subdural Hematoma After Burr-Hole Surgery and Postoperative Drainage: A Systematic Review and Meta-Analysis
Source: PubMed Central journal article supplement (PMC10389757; doi:10.1227/ons.0000000000000794), 2023-06-30
Supplement: ons-25-216-s005.pdf [file ons-25-216-s005.pdf]

**Supplementary Table 2.** Pooled incidence and recurrence rate of irrigation methods in studies using a definition of clinical and radiological factors and a reoperation.

| Irrigation method                                                                                                                        | Number of studies | Number of patients | Pooled incidence | Recurrence rate <sup>@</sup> |
|------------------------------------------------------------------------------------------------------------------------------------------|-------------------|--------------------|------------------|------------------------------|
| Saline/normal saline/isotonic saline/physiological saline                                                                                | 21                | 4157               | 61.1%            | 12.5%                        |
| Ringer solution/Hartmann's solution                                                                                                      | 3                 | 333                | 4.9%             | 16.5%                        |
| Gentamicine induced irrigation method                                                                                                    | 2                 | 622                | 9.1%             | 11.4%                        |
| Warm saline                                                                                                                              | 10                | 1272               | 18.7%            | 11.8%                        |
| Warm Ringer solution                                                                                                                     | 3                 | 421                | 6.2%             | 12.6%                        |
| <sup>@</sup> Calculated by dividing number of patient per group by the total number of patients in which irrigation method was described |                   |                    |                  |                              |
