# Supplementary material for: Recurrent Chronic Subdural Hematoma After Burr-Hole Surgery and Postoperative Drainage: A Systematic Review and Meta-Analysis
Source: PubMed Central journal article supplement (PMC10389757; doi:10.1227/ons.0000000000000794), 2023-06-30
Supplement: ons-25-216-s006.pdf [file ons-25-216-s006.pdf]

**Supplementary Table 3.** Pooled incidence and recurrence rate of postoperative drain location used in studies using a definition of clinical and radiological factors and a reoperation.

| Location of postoperative drain                                                                                                                          | Number of studies | Number of patients | Pooled incidence | Recurrence rate <sup>@</sup> |
|----------------------------------------------------------------------------------------------------------------------------------------------------------|-------------------|--------------------|------------------|------------------------------|
| Subdural                                                                                                                                                 | 44                | 7573               | 98.1%            | 13.5%                        |
| Subperiostal                                                                                                                                             | 1                 | 147                | 1.9%             | 15%                          |
| Subgaleal                                                                                                                                                | No studies        |                    |                  |                              |
| <sup>@</sup> Calculated by dividing the number of patients per group by the total number of patients in which postoperative drain location was described |                   |                    |                  |                              |
