# Supplementary material for: Recurrent Chronic Subdural Hematoma After Burr-Hole Surgery and Postoperative Drainage: A Systematic Review and Meta-Analysis
Source: PubMed Central journal article supplement (PMC10389757; doi:10.1227/ons.0000000000000794), 2023-06-30
Supplement: ons-25-216-s007.pdf [file ons-25-216-s007.pdf]

**Supplementary Table 4.** Pooled incidence and recurrence rate of postoperative drainage time used in studies using a definition of clinical and radiological factors and a reoperation.

| Drainage time in hours*                                                                                                                                 | Number of studies | Number of patients | Pooled incidence | Recurrence rate <sup>@</sup> |
|---------------------------------------------------------------------------------------------------------------------------------------------------------|-------------------|--------------------|------------------|------------------------------|
| ≤24h                                                                                                                                                    | 3                 | 315                | 3.9%             | 12.4%                        |
| ≤48h                                                                                                                                                    | 17                | 5299               | 66.0%            | 12.9%                        |
| ≤72h                                                                                                                                                    | 11                | 1659               | 20.7%            | 17.1%                        |
| ≤96h                                                                                                                                                    | 2                 | 137                | 1.7%             | 17.5%                        |
| ≤120h                                                                                                                                                   | 4                 | 617                | 7.7%             | 10.2%                        |
| <sup>@</sup> Calculated by dividing the number of patients per group by the total number of patients in which postoperative drainage time was described |                   |                    |                  |                              |
